# Supplementary material for: Recruitment of 5′ Hoxa genes in the allantois is essential for proper extra-embryonic function in placental mammals
Source: Oxford University Press journal article supplement (doi:10.1242/dev.075408), 2012-01-05
Supplement: dev075408tables1.pdf [file dev075408tables1.pdf]

**Table S1. Summary of transgene analyses**

| Transgene (Tg) | Position   |            | E8.5     |                           |                          | E12.5    |                      |                      |
|----------------|------------|------------|----------|---------------------------|--------------------------|----------|----------------------|----------------------|
|                | Start      | End        | Tg/total | Expressing/Tg (allantois) | Expressing/Tg (tail bud) | Tg/total | Expressing/Tg (limb) | Expressing/Tg (tail) |
| <i>a</i>       | 6:52214326 | 6:52215187 | 8/43     | 0/8                       | 0/8                      | 12/45    | 0/12                 | 0/12                 |
| <i>b</i>       | 6:52215554 | 6:52216314 | 7/25     | 0/7                       | 0/7                      | 10/36    | 0/10                 | 0/10                 |
| <i>d</i>       | 6:52216243 | 6:52220703 | 9/45     | 0/9                       | 0/9                      | 4/33     | 0/4                  | 0/4                  |
| <i>e</i>       | 6:52220683 | 6:52221080 | 7/68     | 0/7                       | 0/7                      | 13/52    | 0/13                 | 0/13                 |
| <i>g</i>       | 6:52226204 | 6:52226809 | 13/42    | 0/13                      | 0/13                     | 10/44    | 7/10                 | 0/10                 |
| <i>f</i>       | 6:52225971 | 6:52231612 | 7/23     | 0/7                       | 0/7                      | 9/34     | 4/9                  | 0/9                  |
| <i>c</i>       | 6:52215337 | 6:52227090 | 7/45     | 0/7                       | 0/7                      | 4/54     | 4/4                  | 0/4                  |
| <i>h</i>       | 6:52231584 | 6:52240112 | 5/29     | 0/5                       | 0/5                      | 6/50     | 0/50                 | 0/50                 |
| <i>i</i>       | 6:52240064 | 6:52243437 | 15/53    | 0/15                      | 0/15                     | 7/31     | 0/7                  | 0/7                  |
| <i>j</i>       | 6:52241134 | 6:52251078 | 8/37     | 0/8                       | 0/8                      | 10/47    | 0/10                 | 0/10                 |
| <i>k</i>       | 6:52250154 | 6:52258385 | 6/38     | 0/6                       | 0/6                      | 3/38     | 0/3                  | 0/3                  |
| <i>l</i>       | 6:52258283 | 6:52264475 | 9/68     | 0/9                       | 0/9                      | 4/72     | 0/4                  | 0/4                  |
